# Supplementary material for: Destroyed by Slavery? Slavery and African American Family Formation Following Emancipation
Source: Springer Nature journal article supplement (doi:10.1007/s13524-018-0711-6), 2018-09-14
Supplement: MOESM1 [file 16126576]

**OnlineAppendix: Supporting Analysis**

**Table S1: 1880 Summary Statistics for Individuals Linked from the 1880 Cherokee Census to the 1900 United States Census by Slaveholding Information Availability**

|  | No Slaveholding Data  (1) | Slaveholding Data  (2) |
| --- | --- | --- |
| Male (%) | 52.0 | 48.0 |
| Age (Mean) | 15.0 | 18.2 |
| Married (% of age 18+) | 61.9 | 68.3 |
| Literate (% of age 10+) | 25.0 | 25.5 |
| Single Parent Household (%) | 22.4 | 22.0 |

*Notes: Column 1 contains 1880 Cherokee Census summary statistics for individuals located in both the 1880 and 1900 Censuses for whom no slaveholding information is available. Column 2 contains summary statistics for located individuals who do have slaveholding information. See text for more details.*

*Source: 1800 Cherokee Census*

**Table S2: Cherokee Slave Laws**

| Cherokee Nation Laws Relating to Slavery or Race |
| --- |
| • People could not purchase goods from slaves without permission of the slave’s owner.  • Slaves were forbidden to purchase liquor.  • Owners were legally permitted to practice deadly levels “moderate correction” on their slaves.  • A mother’s slave status determining that of her children.  • Anyone of “negro or mulatto parentage” could not hold public office.  • A Cherokee citizen could not marry any “person of color.”  • Free blacks without Cherokee blood could not own horses, cattle, hogs, or improvements (i.e., any physical structures erected on land such as houses, barns, or fences). At the time of this law’s passage in 1840, the few blacks who did own property had it seized and sold.  • Slaves were required to have a pass to leave their owner’s property.  • Slaves could not carry weapons.  • Slaves could not be taught to read or write.  • In 1842, all free blacks who had not been manumitted by a Cherokee citizen were forced to leave the Nation.  • Former owners were personally responsible for the conduct of any manumitted slaves.  • Free blacks were prohibited from encouraging or helping slaves escape from their owners.  • In 1848, the prohibition against teaching slaves to read or write was expanded to include all blacks.  • Individuals with abolitionist sentiments were forbidden from teaching in the nation’s schools. |

Source: Goodell(1853) pp. 417 – 420; Laws of the Cherokee Nation (1852); Laws of the Cherokee Nation (1868)

**Table S3: Relationship Between Maxholding and Residence with a Single Parent Household for Children 14 Years of Age and Younger in 1880**

| **Slaveholding** | **N** | **% in Single Parent Household** |
| --- | --- | --- |
| **<=5** | 85 | 34 |
| **6 to 10** | 157 | 27 |
| **11 to 15** | 112 | 30 |
| **16 to 30** | 182 | 19 |
| **>=30** | 62 | 8 |
| **Total** | 598 | 24 |

*Notes: The max holding measure for slaveholding is used. See text for details on the construction of max holding.*

*Sources: 1880 Cherokee Census, Cherokee Freedmen Dawes Enrollment Cards, and 1860 Cherokee Nation Slave Schedule*

**Table S4: Slaveholding and Single Parent Status in 1880 for Children 14 Years of Age and Younger in 1880**

| **Dependent Variable =1** | | |  |  |  |  |  |
| --- | --- | --- | --- | --- | --- | --- | --- |
| **if child in single parent family** | | **1** | **2** | **3** | **4** | **5** | **6** |
| **Mother's Slaveholding** | | -0.010*** |  |  | -0.011*** |  |  |
|  | | [0.004] |  |  | [0.003] |  |  |
| **Father's Slaveholding** |  | | -0.010*** |  |  | -0.010*** |  |
|  | |  | [0.003] |  |  | [0.003] |  |
| **Max holding** | |  |  | -0.007*** |  |  | -0.007*** |
|  | |  |  | [0.002] |  |  | [0.002] |
| **Age of child** | |  |  |  | 0.002 | -0.001 | 0 |
|  | |  |  |  | [0.005] | [0.004] | [0.004] |
| **1 if head literate** | |  |  |  | 0.116 | 0.099 | 0.093 |
|  | |  |  |  | [0.109] | [0.103] | [0.098] |
| **Total acres owned** | |  |  |  | -0.005 | -0.002 | -0.005 |
|  | |  |  |  | [0.003] | [0.003] | [0.003] |
| **Total Income from Crops** |  | |  |  | 0.019 | 0.002 | 0.016 |
|  | |  |  |  | [0.013] | [0.014] | [0.012] |
| **Value of Livestock Owned** |  | |  |  | -0.018* | -0.027** | -0.020* |
|  | |  |  |  | [0.011] | [0.011] | [0.010] |
| **Observations** | | 529 | 492 | 598 | 529 | 492 | 598 |
| **Pseudo R-squared** | | 0.0484 | 0.0682 | 0.0292 | 0.13 | 0.175 | 0.1 |

*Source: 1880 Cherokee Census, Cherokee Freedmen Dawes Enrollment Cards, and 1860 Cherokee Nation Slave Schedule*

*Notes: The dependent variable is 1 if a child lives in a single parent family. Standard errors are clustered at the family level and reported in brackets. Marginal effects are reported.* *** p<0.01, ** p<0.05, * p<0.1

**Table S5: Slaveholding and Residence in Female-Headed Households in 1880 for Children 14 Years of Age and Younger in 1880**

| **Dependent Variable =1** |  |  |  |  |  |  |
| --- | --- | --- | --- | --- | --- | --- |
| **if child in female-headed family** | **1** | **2** | **3** | **4** | **5** | **6** |
| **Mother's Slaveholding** | -0.009** |  |  | -0.009*** |  |  |
|  | [0.004] |  |  | [0.003] |  |  |
| **Father's Slaveholding** |  | -0.008*** |  |  | -0.007*** |  |
|  |  | [0.002] |  |  | [0.002] |  |
| **Max holding** |  |  | -0.006*** |  |  | -0.006*** |
|  |  |  | [0.002] |  |  | [0.002] |
| **Age of child** |  |  |  | -0.002 | -0.004 | -0.003 |
|  |  |  |  | [0.003] | [0.003] | [0.003] |
| **1 if head literate** |  |  |  | 0.026 | 0.039 | 0.031 |
|  |  |  |  | [0.078] | [0.076] | [0.075] |
| **Total acres owned** |  |  |  | -0.010*** | -0.007*** | -0.008*** |
|  |  |  |  | [0.003] | [0.003] | [0.002] |
| **Crop Income** |  |  |  | 0.036*** | 0.023** | 0.031*** |
|  |  |  |  | [0.010] | [0.010] | [0.009] |
| **Value of Livestock** |  |  |  | -0.009 | -0.013 | -0.012 |
|  |  |  |  | [0.007] | [0.008] | [0.008] |
| **Observations** | 529 | 492 | 598 | 529 | 492 | 598 |
| **Pseudo R-squared** | 0.0464 | 0.0535 | 0.0229 | 0.176 | 0.202 | 0.132 |

*Sources: 1880 Cherokee Census, Cherokee Freedmen Dawes Enrollment Cards, and 1860 Cherokee Nation Slave Schedule*

*Notes: The dependent variable is 1 if a child lives in a female-headed household in 1880. Standard errors are clustered at the family level and reported in brackets. Marginal effects are reported.* *** p<0.01, ** p<0.05, * p<0.1

**Table S6: Table 8, Panel A, Columns 1 to 6**

| |  | 1 | 2 | 3 | 4 | 5 | 6 | | --- | --- | --- | --- | --- | --- | --- | |  |  |  |  |  |  |  | | Head's Own Slaveholding | 0.005 | 0.005 | 0.005 |  |  |  | |  | [0.004] | [0.004] | [0.004] |  |  |  | | Total Income from Crops in 1880 |  |  | -0.005 |  |  | -0.008** | |  |  |  | [0.004] |  |  | [0.004] | | Value of Livestock Owned in 1880 |  |  | -0.005 |  |  | -0.005 | |  |  |  | [0.006] |  |  | [0.006] | | Head1880Single |  | 0.19 | 0.188 |  | 0.191 | 0.174 | |  |  | [0.145] | [0.145] |  | [0.107] | [0.106] | | Head's Mother's Slaveholding |  |  |  | 0.005 | 0.006 | 0.005 | |  |  |  |  | [0.003] | [0.003] | [0.003] | | Head's Father's Slaveholding |  |  |  |  |  |  | |  |  |  |  |  |  |  | | Head's Max Holding |  |  |  |  |  |  | |  |  |  |  |  |  |  | |  |  |  |  |  |  |  | | Observations | 335 | 335 | 335 | 455 | 455 | 447 | | Pseudo R-squared | 0.0206 | 0.0421 | 0.0686 | 0.016 | 0.0446 | 0.0964 | |  |  |  |  |  |  |
| --- | --- | --- | --- | --- | --- | --- | --- | --- | --- | --- | --- | --- | --- | --- | --- | --- | --- | --- | --- | --- | --- | --- | --- | --- | --- | --- | --- | --- | --- | --- | --- | --- | --- | --- | --- | --- | --- | --- | --- | --- | --- | --- | --- | --- | --- | --- | --- | --- | --- | --- | --- | --- | --- | --- | --- | --- | --- | --- | --- | --- | --- | --- | --- | --- | --- | --- | --- | --- | --- | --- | --- | --- | --- | --- | --- | --- | --- | --- | --- | --- | --- | --- | --- | --- | --- | --- | --- | --- | --- | --- | --- | --- | --- | --- | --- | --- | --- | --- | --- | --- | --- | --- | --- | --- | --- | --- | --- | --- | --- | --- | --- | --- | --- | --- | --- | --- | --- | --- | --- | --- | --- | --- | --- | --- | --- | --- | --- | --- | --- | --- | --- | --- | --- | --- | --- | --- | --- | --- | --- |
| *Standard errors are in brackets and clustered at the household level. *** p<0.01, ** p<0.05*  *Sources: 1900 United States Census, 1880 Cherokee Census, Cherokee*  *Freedmen Dawes Enrollment Cards, and 1860 Cherokee Nation Slave Schedule* |  |  |  |  |  |  |
|  |  |  |  |  |  |  |
|  |  |  |  |  |  |  |

| **Table S7: Table 8, Panel A, Columns 7 to 12** |  |  |  |  |  |  |
| --- | --- | --- | --- | --- | --- | --- |
| |  | 7 | 8 | 9 | 10 | 11 | 12 | | --- | --- | --- | --- | --- | --- | --- | |  |  |  |  |  |  |  | | Head's Own Slaveholding |  |  |  |  |  |  | |  |  |  |  |  |  |  | | Total Income from Crops in 1880 |  |  | -0.006 |  |  | -0.008** | |  |  |  | [0.004] |  |  | [0.003] | | Value of Livestock Owned in 1880 |  |  | -0.003 |  |  | -0.005 | |  |  |  | [0.004] |  |  | [0.006] | | Head1880Single |  | 0.187 | 0.166 |  | 0.216** | 0.203** | |  |  | [0.118] | [0.117] |  | [0.100] | [0.099] | | Head's Mother's Slaveholding |  |  |  |  |  |  | |  |  |  |  |  |  |  | | Head's Father's Slaveholding | 0.001 | 0.003 | 0.003 |  |  |  | |  | [0.003] | [0.003] | [0.002] |  |  |  | | Head's Max Holding |  |  |  | 0.005 | 0.006** | 0.006** | |  |  |  |  | [0.003] | [0.003] | [0.003] | |  |  |  |  |  |  |  | | Observations | 335 | 405 | 398 | 534 | 534 | 526 | | Pseudo R-squared | 0.000489 | 0.0444 | 0.074 | 0.0227 | 0.0563 | 0.0989 | |  |  |  |  |  |  |

*Standard errors are in brackets and clustered at the household level. *** p<0.01, ** p<0.05*

*Sources: 1900 United States Census, 1880 Cherokee Census, Cherokee*

*Freedmen Dawes Enrollment Cards, and 1860 Cherokee Nation Slave Schedule*

**Table S8: Panel B, Columns 1 to 6**

|  | 1 | 2 | 3 | 4 | 5 | 6 |
| --- | --- | --- | --- | --- | --- | --- |
|  |  |  |  |  |  |  |
| Head's Own Slaveholding | 0.003 | 0.003 | 0.003 |  |  |  |
|  | [0.004] | [0.004] | [0.004] |  |  |  |
| Total Income from Crops in 1880 |  |  | -0.008** |  |  | -0.009** |
|  |  |  | [0.004] |  |  | [0.004] |
| Value of Livestock Owned in 1880 |  |  | -0.003 |  |  | -0.006 |
|  |  |  | [0.004] |  |  | [0.006] |
| Head1880Single |  | 0.182 | 0.189 |  | 0.202 | 0.198 |
|  |  | [0.144] | [0.145] |  | [0.107] | [0.106] |
| Head's Mother's Slaveholding |  |  |  | 0.005 | 0.006 | 0.006 |
|  |  |  |  | [0.004] | [0.004] | [0.004] |
| Head's Father's Slaveholding |  |  |  |  |  | -0.002 |
|  |  |  |  |  |  | [0.001] |
| Head's Max Holding |  |  |  |  |  |  |
|  |  |  |  |  |  |  |
| Observations | 335 | 335 | 335 | 455 | 455 | 455 |
| Pseudo R-squared | 0.00544 | 0.0211 | 0.0536 | 0.00957 | 0.0319 | 0.101 |

*Standard errors are in brackets and clustered at the household level. *** p<0.01, ** p<0.05*

*Sources: 1900 United States Census, 1880 Cherokee Census, Cherokee*

*Freedmen Dawes Enrollment Cards, and 1860 Cherokee Nation Slave Schedule*

**Table S9: Table 8, Panel B, Columns 7 to 12**

|  | 7 | 8 | 9 | 10 | 11 | 12 |
| --- | --- | --- | --- | --- | --- | --- |
|  |  |  |  |  |  |  |
| Head's Own Slaveholding |  |  |  |  |  |  |
|  |  |  |  |  |  |  |
| Total Income from Crops in 1880 |  |  | -0.006 |  |  | -0.009*** |
|  |  |  | [0.003] |  |  | [0.003] |
| Value of Livestock Owned in 1880 |  |  | -0.004 |  |  | -0.005 |
|  |  |  | [0.004] |  |  | [0.004] |
| Head1880Single |  | 0.179 | 0.183 |  | 0.206** | 0.202** |
|  |  | [0.119] | [0.116] |  | [0.098] | [0.098] |
| Head's Mother's Slaveholding |  |  |  |  |  |  |
|  |  |  |  |  |  |  |
| Head's Father's Slaveholding | -0.003 | 0 | 0.001 |  |  | -0.002 |
|  | [0.004] | [0.003] | [0.003] |  |  | [0.001] |
| Head's Max Holding |  |  |  | 0.004 | 0.004 | 0.005 |
|  |  |  |  | [0.003] | [0.003] | [0.003] |
|  |  |  |  |  |  |  |
| Observations | 335 | 405 | 398 | 534 | 534 | 534 |
| Pseudo R-squared | 0.00791 | 0.0168 | 0.0476 | 0.00661 | 0.0288 | 0.0861 |

*Standard errors are in brackets and clustered at the household level. *** p<0.01, ** p<0.05*

*Sources: 1900 United States Census, 1880 Cherokee Census, Cherokee*

*Freedmen Dawes Enrollment Cards, and 1860 Cherokee Nation Slave Schedule*

**Figure S1: Density of Slaveholding in the Cherokee Nation and United States, 1860**

Source: 1860 Cherokee Nation Slave Schedules and 1860 SlavePUMS.
